# Supplementary material
Source: ML conference proceedings conference paper supplement (https://openaccess.thecvf.com/content/CVPR2024/html/Mirdehghan_TurboSL_Dense_Accurate_CVPR_2024_paper.html)
Supplement: Supplementary file 1 [file Mirdehghan_TurboSL_Dense_Accurate_CVPR_2024_supplemental.zip]

Archive with 4 entries (4 files):
- TurboSL-supp-document.pdf
- __MACOSX/._TurboSL-supp-document.pdf
- TurboSL-supp-video.mp4
- __MACOSX/._TurboSL-supp-video.mp4
